# Supplementary material for: Discharge product morphology and increased charge performance of lithium–oxygen batteries with graphene nanosheet electrodes: the effect of sulphur doping
Source: Royal Society of Chemistry journal article supplement (doi:10.1039/c2jm34718k), 2012-01-01
Supplement: c2jm34718k.pdf [file c2jm34718k.pdf]

Supplementary Material (ESI) for Journal of Materials Chemistry  
This journal is (c) The Royal Society of Chemistry 2011

## Electronic Supplementary Information

# Discharge Product Morphology and Increased Charge Performance of Lithium-oxygen Batteries with Graphene Nanosheet Electrodes: The Effect of Sulphur Doping

Yongliang Li,<sup>a</sup> Jiajun Wang,<sup>a</sup> Xifei Li,<sup>a</sup> Dongsheng Geng,<sup>a</sup> Mohammad N. Banis,<sup>a</sup>  
Yongji Tang,<sup>a,b</sup> Dongniu Wang,<sup>a,b</sup> Ruying Li,<sup>a</sup> Tsun-Kong Sham<sup>b</sup> and Xueliang  
Sun<sup>\*a</sup>

<sup>a</sup> Department of Mechanical and Materials Engineering, University of Western Ontario, London, Ontario, Canada, N6A 5B9 Fax: +1-519-6613020; Tel: +1-519-6612111, Ext. 87759; E-mail: [xsun@eng.uwo.ca](mailto:xsun@eng.uwo.ca)

<sup>b</sup> Department of Chemistry, University of Western Ontario, London, Ontario, Canada, N6A 5B7

Supplementary Material (ESI) for Journal of Materials Chemistry  
This journal is (c) The Royal Society of Chemistry 2011

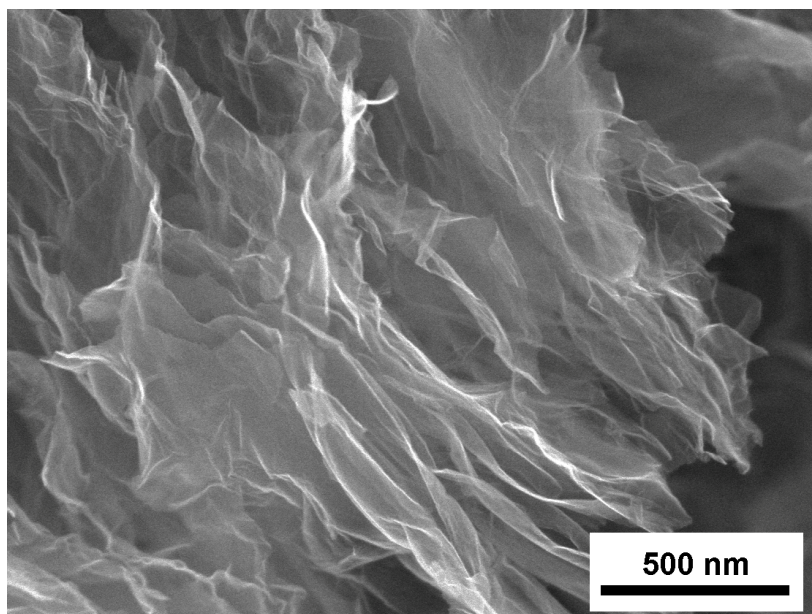

**Fig. S1** SEM image of graphene nanosheets.

Supplementary Material (ESI) for Journal of Materials Chemistry  
This journal is (c) The Royal Society of Chemistry 2011

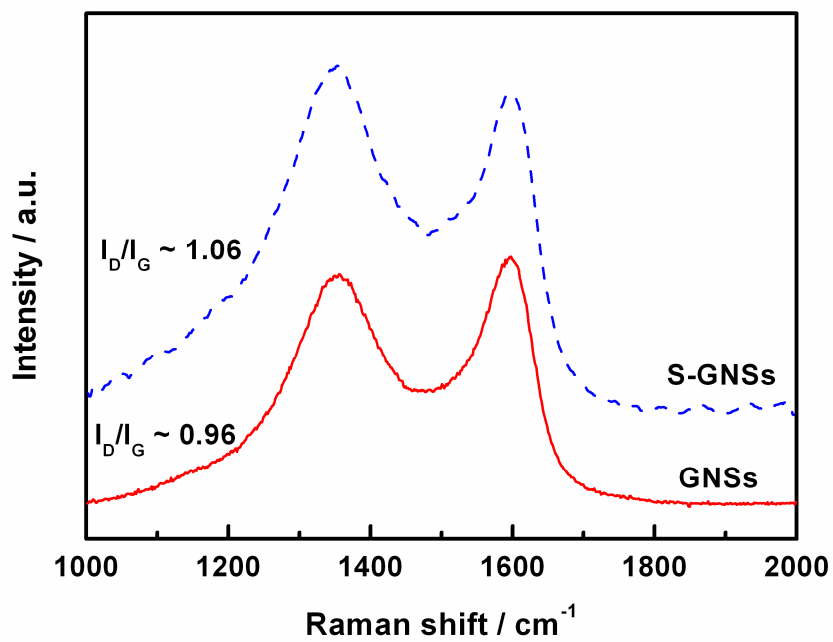

Fig. S2 Raman spectroscopy of S-GNSs and GNSs.

Supplementary Material (ESI) for Journal of Materials Chemistry  
This journal is © The Royal Society of Chemistry 2011

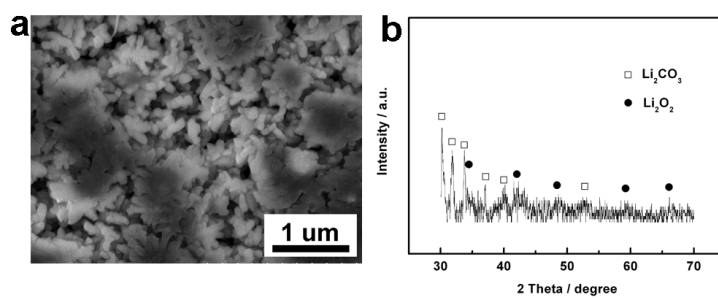

**Fig. S3** SEM image (a) and XRD pattern (b) of the discharge product after 2<sup>nd</sup> discharge.
